# Supplementary material for: Vanadium-doped sodium phosphomolybdate salts as catalysts in the terpene alcohols oxidation with hydrogen peroxide
Source: Royal Society of Chemistry journal article supplement (doi:10.1039/d1ra04191f), 2021-01-01
Supplement: d1ra04191f1.pdf [file d1ra04191f1.pdf]

## **Vanadium-doped Sodium phosphomolybdate salts as catalysts in the terpene alcohols oxidation with hydrogen peroxide**

CASTELO BANDANE VILANCULO<sup>1\*</sup>, MÁRCIO JOSÉ DA SILVA<sup>2</sup>, ALANA ALVES RODRIGUES,  
SUKARNO OLAVO FERREIRA<sup>2</sup> AND RENE CHAGAS DA SILVA<sup>2</sup>

<sup>1</sup>*Chemistry Department, Pedagogic University of Mozambique, FCNM, Campus de Lhanguene, Av. de Moçambique, km 1, Maputo, C.P.: 4040, Fax: (+258)21401082.*

<sup>2</sup>*Chemistry Department, Federal University of Viçosa, Viçosa, Minas Gerais, Brasil. zip-code: 36590-000*

### **Supplemental material**

List of Figures

**Figure 1SM.** FT-IR spectra of Sodium phosphomolybdate and vanadophosphomolybdate Sodium salts.

**Figure 2SM.** UV-Vis spectra of Vanadium trisubstituted phosphomolybdate catalyst in aqueous solution.

**Figure 3SM.** Secondary structure of Na<sub>4</sub>PMo<sub>11</sub>VO<sub>40</sub>

**Figure 4SM.** Isotherms of adsorption and desorption of N<sub>2</sub> and volume and diameters porous (inset) of pure Sodium phosphomolybdate catalyst and after the Vanadium doping.

**Fig. 5SM** Scanning electronic microscopy images of undoped and Vanadium-doped Sodium phosphomolybdate salts.

**Fig. 6SM** EDS spectra of undoped and Vanadium-doped Sodium phosphomolybdate salts.

List of Tables

**Table 1SM.** Porosimetry characteristics of pure and Vanadium doped-Sodium phosphomolybdate salts<sup>a</sup>

**Table 2SM.** Hydration water number per mol of catalyst determined through thermal analysis.

**Table 3SM.** Elemental analysis data theoretical and experimental obtained from undoped and Vanadium-doped phosphomolybdate salts.

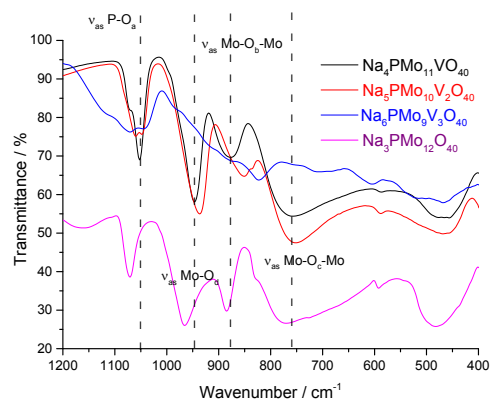

**Fig. 1SM** FT-IR spectra of Sodium phosphomolybdate salts unsubstituted and Vanadium substituted.

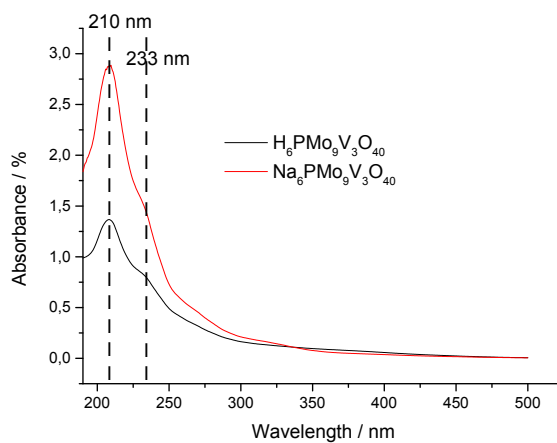

**Figure 2SM.** UV-Vis spectra of Vanadium trisubstituted phosphomolybdate catalyst in aqueous solution

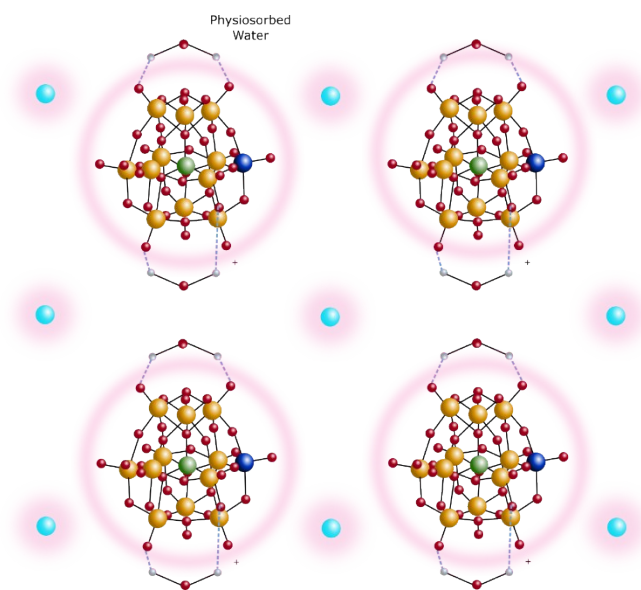

**Fig. 3SM.** Secondary structure of Na<sub>4</sub>PMo<sub>11</sub>VO<sub>40</sub>

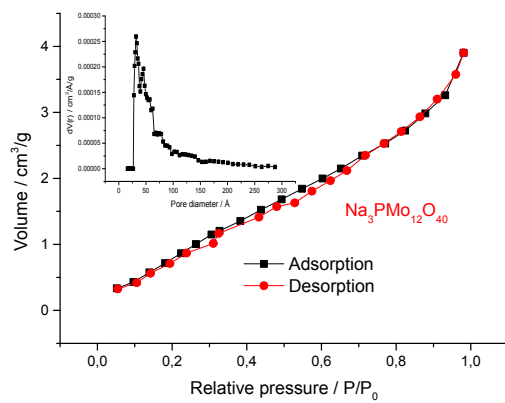

(a)

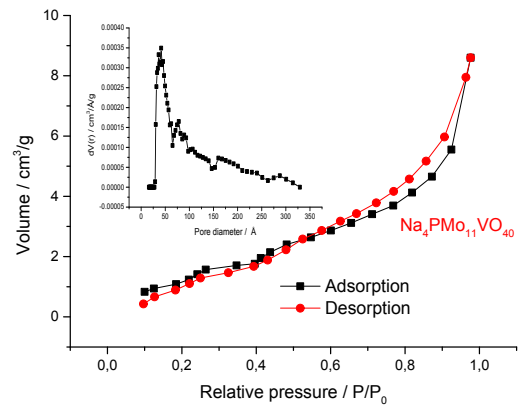

(b)

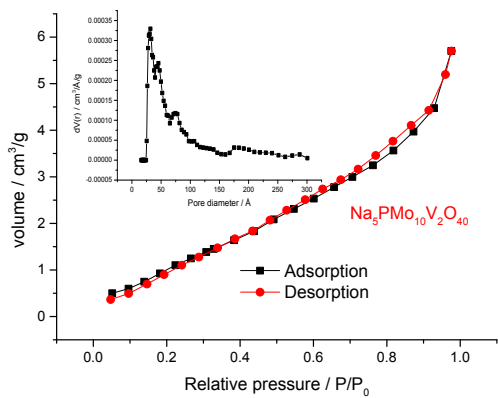

(c)

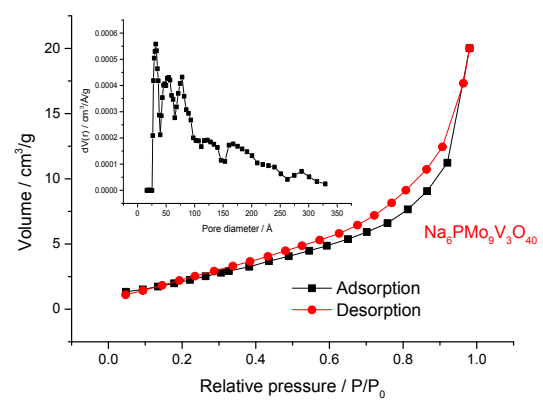

(d)

**Fig. 4SM** Isotherms of adsorption and desorption of  $N_2$ , volume, and distribution of porous diameters (inset) of pure Sodium phosphomolybdate catalyst before (a) and after the Vanadium doping (b-d).

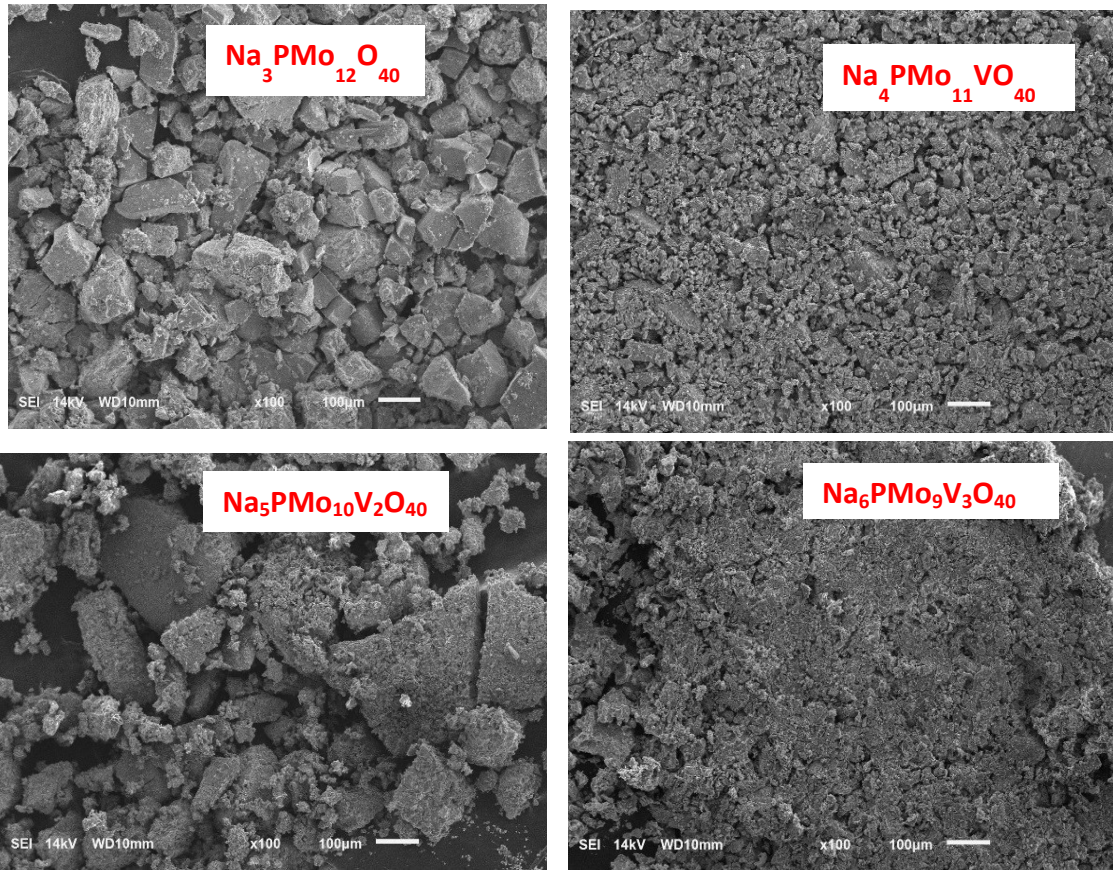

**Fig. 5** SEM Scanning electronic microscopy images of undoped and Vanadium-doped Sodium phosphomolybdate salts.

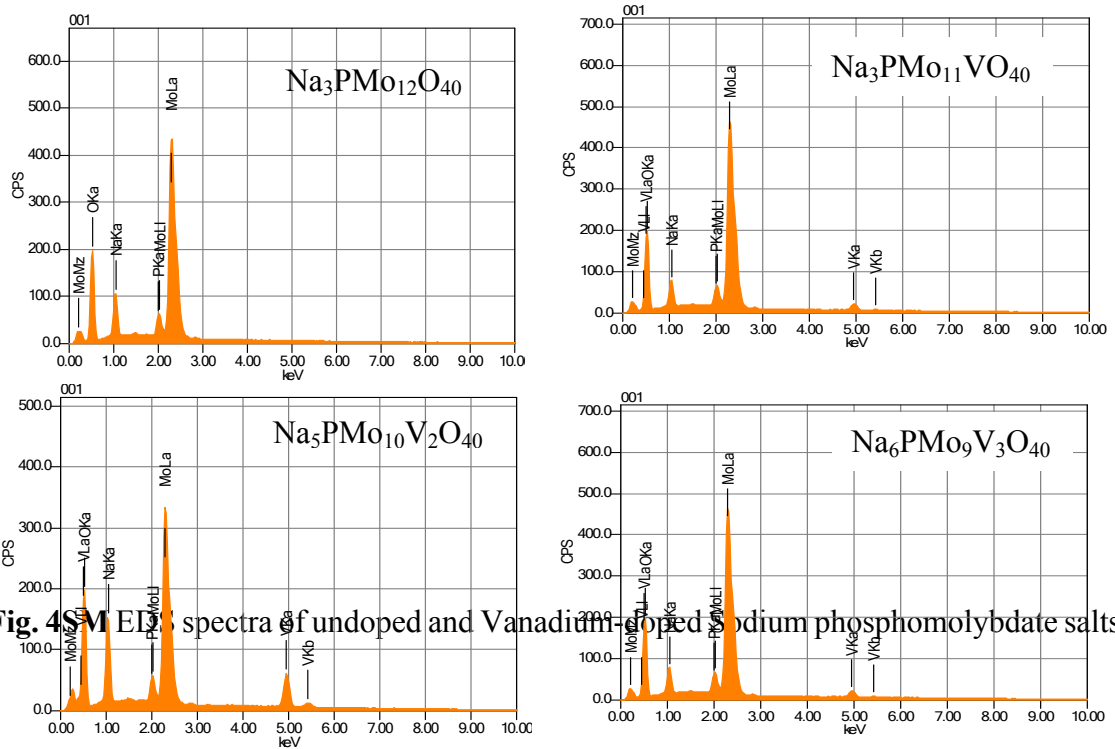

**Fig. 4** SEM EDS spectra of undoped and Vanadium-doped Sodium phosphomolybdate salts

**Fig. 6** SEM EDS spectra of undoped and Vanadium-doped Sodium phosphomolybdate salts.

**Table 1SM.** Porosimetry characteristics of undoped and Vanadium doped-Sodium phosphomolybdate salts<sup>a</sup>

| Catalyst                                                         | S <sub>BET</sub> (m <sup>2</sup> /g) | V <sub>DFT</sub> (cm <sup>3</sup> /g) | D (Å) |
|------------------------------------------------------------------|--------------------------------------|---------------------------------------|-------|
| Na <sub>3</sub> PMo <sub>12</sub> O <sub>40</sub>                | 1.8                                  | 5.2 x 10 <sup>-3</sup>                | 31.7  |
| Na <sub>4</sub> PMo <sub>11</sub> VO <sub>40</sub>               | 3.1                                  | 1.5 x10 <sup>-3</sup>                 | 41.5  |
| Na <sub>5</sub> PMo <sub>10</sub> V <sub>2</sub> O <sub>40</sub> | 3.7                                  | 7.6 x 10 <sup>-3</sup>                | 31.7  |
| Na <sub>6</sub> PMo <sub>9</sub> V <sub>3</sub> O <sub>40</sub>  | 6.4                                  | 25.3 x 10 <sup>-3</sup>               | 31.7  |

<sup>a</sup>S<sub>BET</sub> = surface area; V<sub>DFT</sub> = cumulative pore volume; D = pore diameter

**Table 2SM.** Hydration water number per mol of catalyst determined through thermal analysis (TG/DTG).

| Catalyst                                                         | Total hydration water (573 K) |
|------------------------------------------------------------------|-------------------------------|
| Na <sub>3</sub> PMo <sub>12</sub> O <sub>40</sub>                | 10                            |
| Na <sub>4</sub> PMo <sub>11</sub> VO <sub>40</sub>               | 7                             |
| Na <sub>5</sub> PMo <sub>10</sub> V <sub>2</sub> O <sub>40</sub> | 10                            |
| Na <sub>6</sub> PMo <sub>9</sub> V <sub>3</sub> O <sub>40</sub>  | 13                            |



**Table 3SM.** Elemental analysis data theoretical and experimental obtained from undoped and Vanadium-doped phosphomolybdate salts.

| Catalyst                                            | Elemental composition |      |       |      |       |      |       |      |       |      |
|-----------------------------------------------------|-----------------------|------|-------|------|-------|------|-------|------|-------|------|
|                                                     | (wt. %)               |      |       |      |       |      |       |      |       |      |
|                                                     | Na                    |      | P     |      | Mo    |      | V     |      | O     |      |
|                                                     | Calc.                 | Exp. | Calc. | Exp. | Calc. | Exp. | Calc. | Exp. | Calc. | Exp. |
| $\text{Na}_3\text{PMo}_{12}\text{O}_{40}$           | 4                     | 5    | 2     | 2    | 61    | 62   | 0     | 0    | 33    | 31   |
| $\text{Na}_4\text{PMo}_{11}\text{VO}_{40}$          | 5                     | 5    | 2     | 2    | 56    | 58   | 3     | 3    | 34    | 33   |
| $\text{Na}_5\text{PMo}_{10}\text{V}_2\text{O}_{40}$ | 6                     | 8    | 2     | 2    | 52    | 50   | 5     | 9    | 35    | 31   |
| $\text{Na}_6\text{PMo}_9\text{V}_3\text{O}_{40}$    | 8                     | 10   | 2     | 2    | 47    | 45   | 8     | 12   | 35    | 31   |
